# Supplementary material
Source: Springer Nature journal article supplement (https://www.springermedizin.de/resource/supplementary/12933_2014_844_MOESM3_ESM.pdf/9539370)

**A**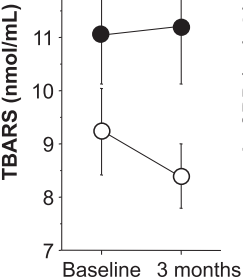**B**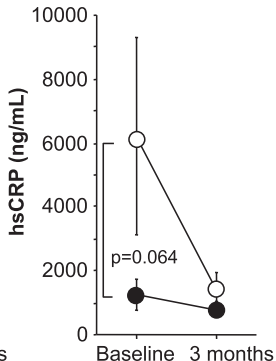**C**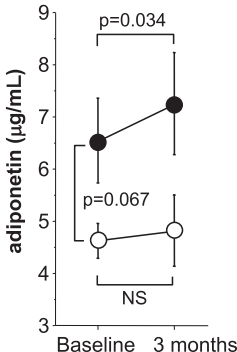

Supplement: MOESM3 [file 9539370]
